# Supplementary material for: Designed enzymatically degradable amphiphilic conetworks by radical ring-opening polymerization
Source: Royal Society of Chemistry journal article supplement (doi:10.1039/c5py00962f), 2015-01-01
Supplement: c5py00962f1.pdf [file c5py00962f1.pdf]

## Supporting Information

### Designed Enzymatically Degradable Amphiphilic Conetworks by Radical Ring-Opening Polymerization

*Yinfeng Shi, Holger Schmalz, Seema Agarwal\**

Macromolecular Chemistry II and Bayreuth Center for Colloids and Interfaces, University of  
Bayreuth, Universitätsstraße 30, 95440 Bayreuth, Germany

\*Corresponding author: Seema Agarwal

E-mail address: agarwal@uni-bayreuth.de

#### Homopolymerization behavior of VCP

The homopolymerization behavior of the monomer VCP under radical ring-opening polymerization condition at 120 °C was studied. After purification, the polymers were obtained as white solid. The representative  $^1\text{H}$  NMR spectrum of VCP homopolymer is shown in Figure S1. The characteristic proton signals of VCP units after polymerization are marked. According to the previous report of T. Endo *et al.*<sup>1</sup>, the structures of both ring-opened and ring-closed VCP units coexist in the VCP homopolymer. In the  $^1\text{H}$  NMR spectrum, the peak at  $\delta = 5.2$  ppm corresponds to the double bond protons from the VCP ring-opened structure (Structure **1** in Figure S1). The broad signals between 1.5-2.5 ppm can be assigned to the protons from the VCP ring-closed structure (Structure **2** in Figure S1). The peaks at  $\delta = 1.1$  ppm and  $\delta = 4.1$  ppm

correspond to the  $\text{CH}_3\text{CH}_2\text{O}-$  group, which exists in both - the ring-opened and ring-closed - structure. Through comparing the total peak areas of double bond protons (peak *c* in Figure S1,  $\delta = 5.2$  ppm) and methyl group (peak *a* in Figure S1,  $\delta = 1.2$  ppm) the fraction of VCP units with ring-opened structure was calculated to be 52 mol%.

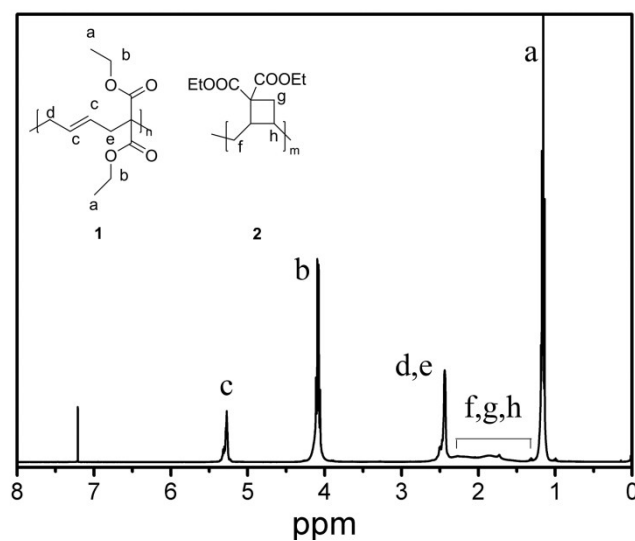

**Figure S1.**  $^1\text{H}$ -NMR spectrum of VCP homopolymer prepared at 120 °C. Structure 1: VCP unit with ring-opened structure in PVCP; structure 2: VCP unit with ring-closed structure in PVCP.

## Structural characterization of APCNs

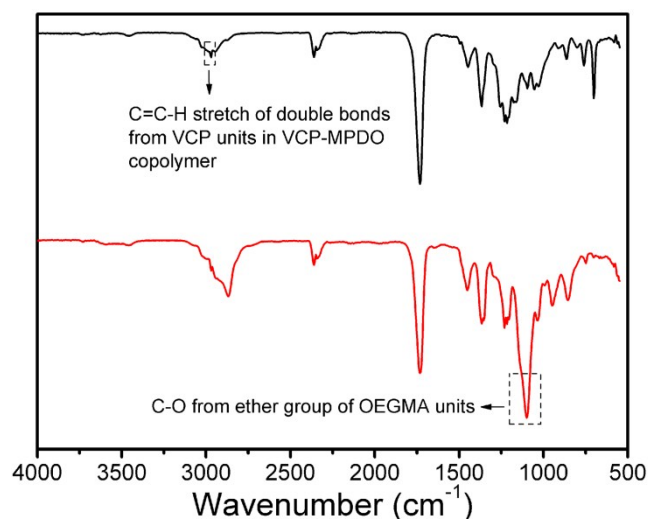

**Figure S2.** IR spectra of original VCP-MPDO copolymers (black) and APCNs (gel-3) after purification (red).

### Calculation of reactivity ratios for VCP and MPDO copolymerization

The copolymerization of VCP and MPDO was carried out with various monomer feed ratios till low conversions (~5%) to determine the reactivity ratios using kelen-Tüdös method. The feed ratios and compositions of the resulting copolymers are summarized in Table S1.

**Table S1.** VCP-MPDO copolymerization for determining reactivity ratios

| entry <sup>a</sup> | VCP:MPDO in feed | Yield (%) | VCP:MPDO in Copolymer |
|--------------------|------------------|-----------|-----------------------|
|                    | (mol-%)          |           | (mol-%) <sup>b</sup>  |
| Copolymer I        | 80:20            | 5.7       | 67:33                 |
| Copolymer II       | 59:41            | 7.8       | 53:47                 |
| Copolymer III      | 39:61            | 4.2       | 46:54                 |
| Copolymer IV       | 28:72            | 5.1       | 42:58                 |
| Copolymer V        | 13:87            | 4.4       | 34:66                 |

<sup>a</sup> reaction time: 6 h; reaction temperature: 120 °C; initiator: di-*tert*-butyl peroxide (1 wt% of monomer)

<sup>b</sup> Determined using <sup>1</sup>H-NMR of the resulting VCP-MPDO copolymers.

The  $r$ -parameters are determined applying the Kelen-Tüdös method as follows (Table S2).<sup>2</sup>

$$\eta = \left[ r_1 + \frac{r_2}{\alpha} \right] \cdot \xi - \frac{r_2}{\alpha} \quad (1)$$

$$\eta = \frac{G}{\alpha + F} \quad (2)$$

$$\xi = \frac{F}{\alpha + F} \quad (3)$$

$$G = \frac{x(y-1)}{y} \quad (4)$$

$$F = \frac{x^2}{y} \quad (5)$$

$x$  = molar ratio of comonomers in feed =  $m_1/m_2$  ;  $y$  = molar composition of the copolymer =

$M_1/M_2$

$\alpha$  = constant =  $\sqrt{F_m F_M}$  ( $F_m$  = smallest  $F$ -value;  $F_M$  = biggest  $F$ -value)

**Table S2.**  $r$ -parameters calculation using Kelen-Tüdös method

|               | x    | y    | G     | F    | $\eta$ | $\xi$ |
|---------------|------|------|-------|------|--------|-------|
| Copolymer I   | 4.04 | 2.04 | 2.06  | 8.00 | 0.24   | 0.93  |
| Copolymer II  | 1.41 | 1.12 | 0.16  | 1.77 | 0.07   | 0.75  |
| Copolymer III | 0.65 | 0.86 | -0.10 | 0.49 | -0.10  | 0.45  |
| Copolymer IV  | 0.39 | 0.71 | -0.16 | 0.21 | -0.19  | 0.26  |
| Copolymer V   | 0.15 | 0.51 | -0.14 | 0.04 | -0.22  | 0.07  |

$$\alpha = \sqrt{F_m F_M} = 0.5923$$

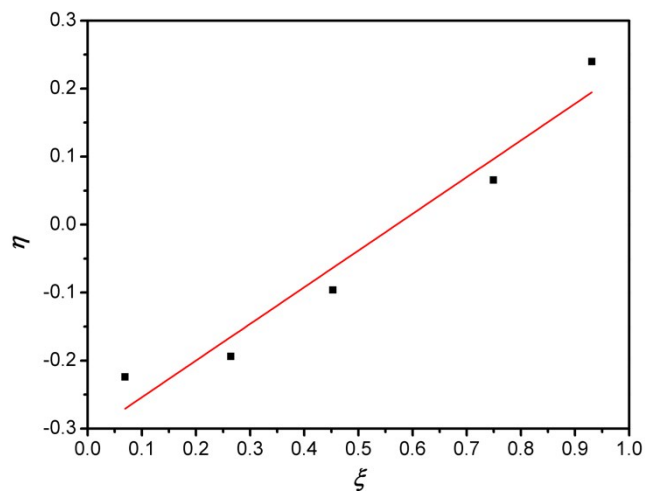

**Figure S3.** Kelen-Tüdös plot for the determination of VCP and MPDO reactivity ratios (linear fit to the experimental data:  $R^2 = 0.953$ ).

The plot of  $\eta$  vs.  $\xi$  is shown in Figure S3. From the slope and intercept of the linear fit, the monomer reactivity ratios of VCP and MPDO were determined to  $r_{VCP} = 0.23 \pm 0.08$  and  $r_{MPDO} = 0.18 \pm 0.02$ . A comparison of the experimental data from Table S1 with the calculated copolymerization diagram, using the  $r$ -values determined by the Kelen-Tüdös method, shows an excellent agreement.

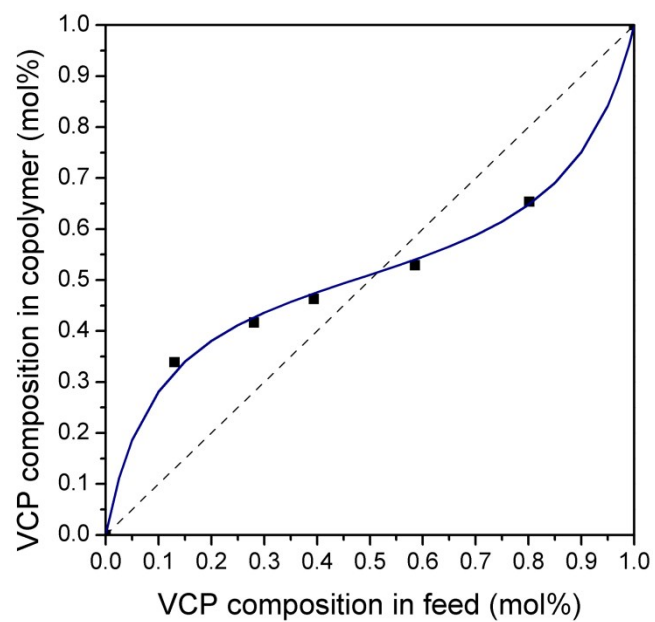

**Figure S4.** Calculated copolymerization diagram (blue curve) and comparison with experimental data (squares) from Table S1.

## Thermal properties of VCP-MPDO copolymers

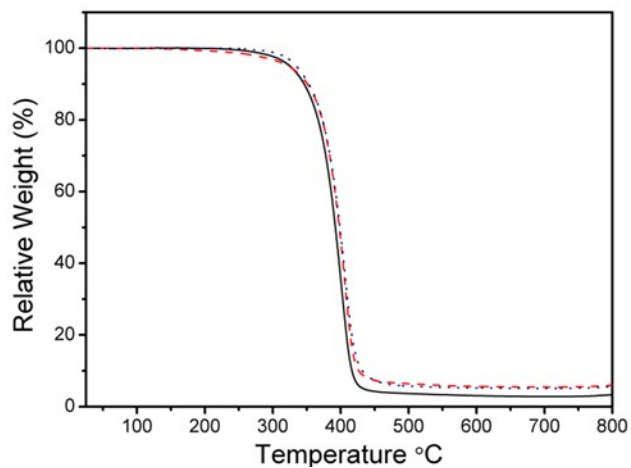

**Figure S5.** TGA profiles of VCP-MPDO copolymers with different comonomer ratios in feed.

Black-solid line: VCP:MPDO = 30:70; red-broken line: VCP:MPDO = 50:50; blue-dotted line: VCP:MPDO = 70:30.

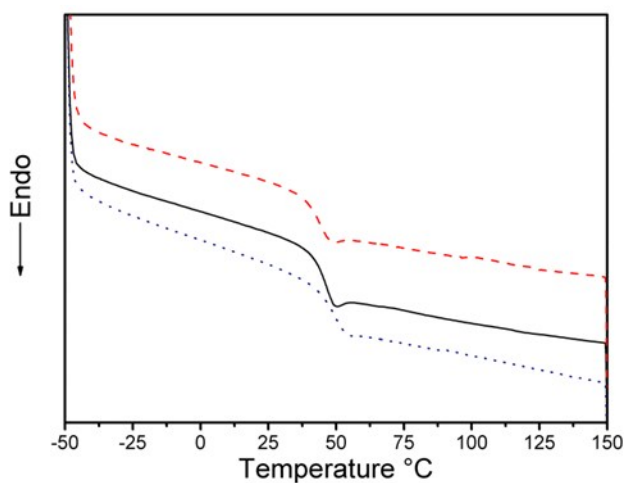

**Figure S6.** DSC heating traces of VCP-MPDO copolymers with different comonomer ratios in

feed. Black-solid line: VCP:MPDO = 30:70; red-broken line: VCP:MPDO = 50:50; blue-dotted line: VCP:MPDO = 70:30.

## Reference

- (1) Sanda, F.; Takata, T.; Endo, T. *Macromolecules* **1993**, 26, 1818-1824.
- (2) Kelen, T.; Tüdös, F. *J. Macromol. Sci., Part A: Chem.* **1975**, 9, 1-27.
